# Supplementary material for: Theoretical Study of p-Block Metal Single-Atom-Loaded Carbon Nitride Catalyst for Photocatalytic Water Splitting
Source: MDPI journal article supplement (doi:10.3390/molecules29092030), 2024-04-28
Supplement: s1 [file s1]

# Supplementary information

## Theoretical study of *p*-block metal single atom loaded carbon nitride catalyst for photocatalytic water splitting

Mengning Chen <sup>1</sup>, Yidi Wu <sup>1</sup>, Qiang Wan <sup>2, \*</sup> and Sen Lin <sup>1, \*</sup>

1 State Key Laboratory of Photocatalysis on Energy and Environment, Fuzhou University, Fuzhou, 350116, China

2 Key Laboratory of the Ministry of Education for Advanced Catalysis Materials, Institute of Physical Chemistry, Zhejiang Normal University, Jinhua, 321004, China

E-mail: slin@fzu.edu.cn; qwan@zjnu.edu.cn

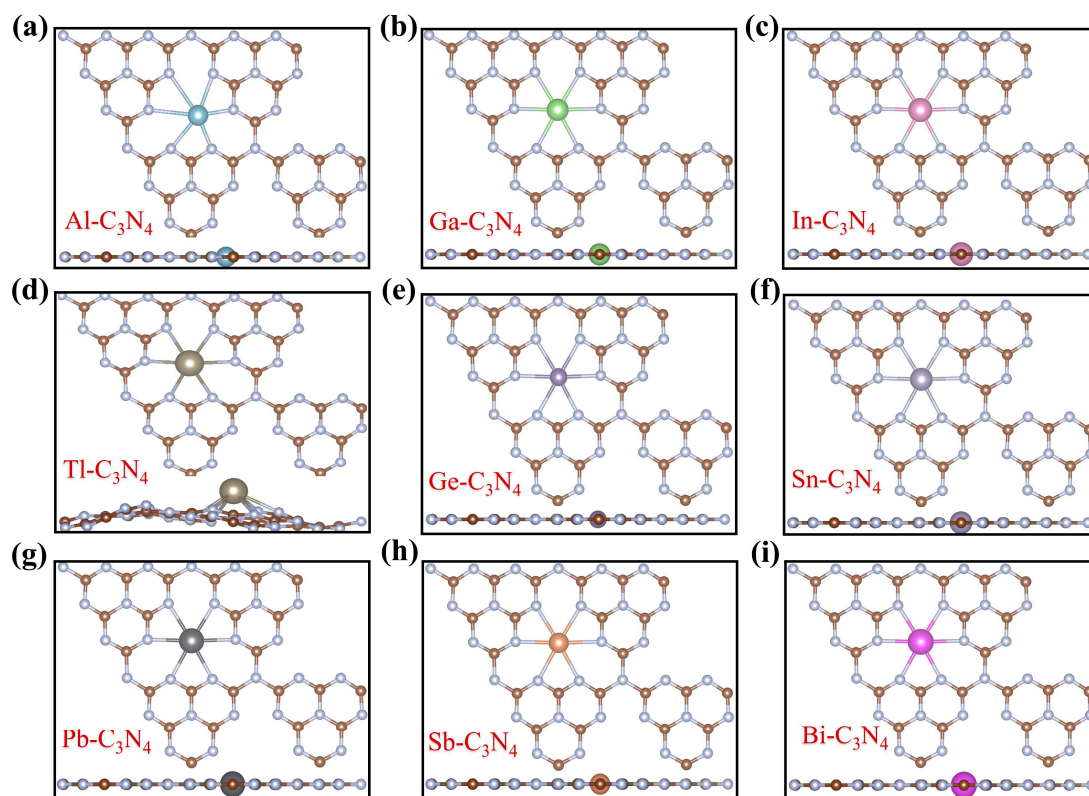

**Figure S1.** Optimized structures of  $\text{PM-C}_3\text{N}_4$  (PM = Al, Ga, In, Tl, Ge, Sn, Pb, Sb, Bi). Color scheme: brown, carbon; greyish-white, nitrogen.

**Table S1.** The average bond length between the PM and nitrogen atoms in PM-C<sub>3</sub>N<sub>4</sub>.

| p-block metal (PM) |    | L(PM-N) (Å) |
|--------------------|----|-------------|
| The IIIA group     | Al | 2.39        |
|                    | Ga | 2.40        |
|                    | In | 2.42        |
| The IVA group      | Ge | 2.35        |
|                    | Sn | 2.42        |
|                    | Pb | 2.44        |
| The VA group       | Sb | 2.40        |
|                    | Bi | 2.43        |

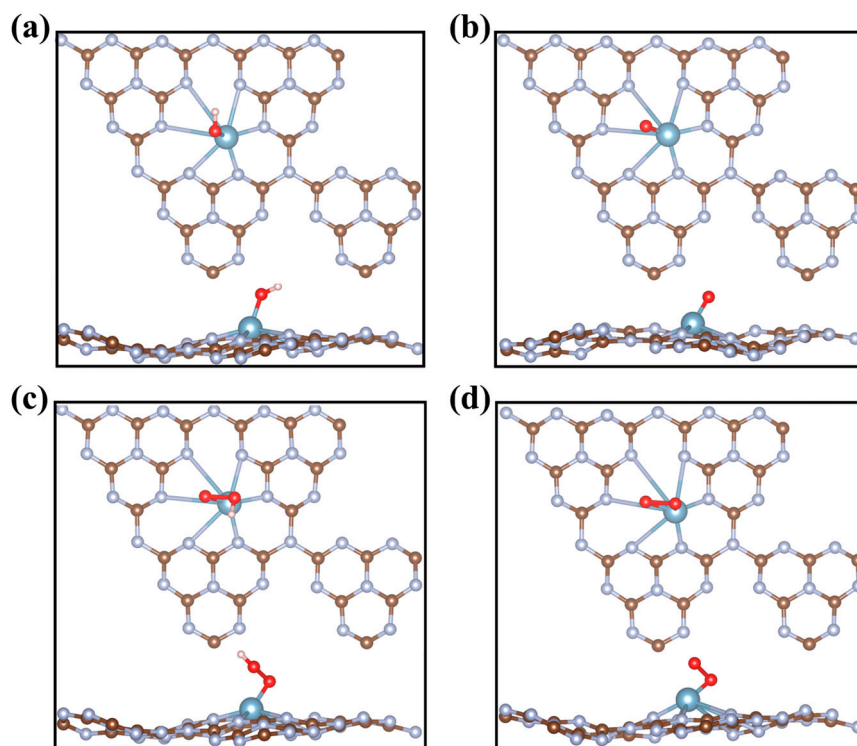

**Figure S2.** Optimized structures for intermediates during OER catalyzed by Al-C<sub>3</sub>N<sub>4</sub>. (a) \*OH; (b) \*O; (c) \*OOH; (d) \*OO intermediates. Color scheme: red, oxygen.



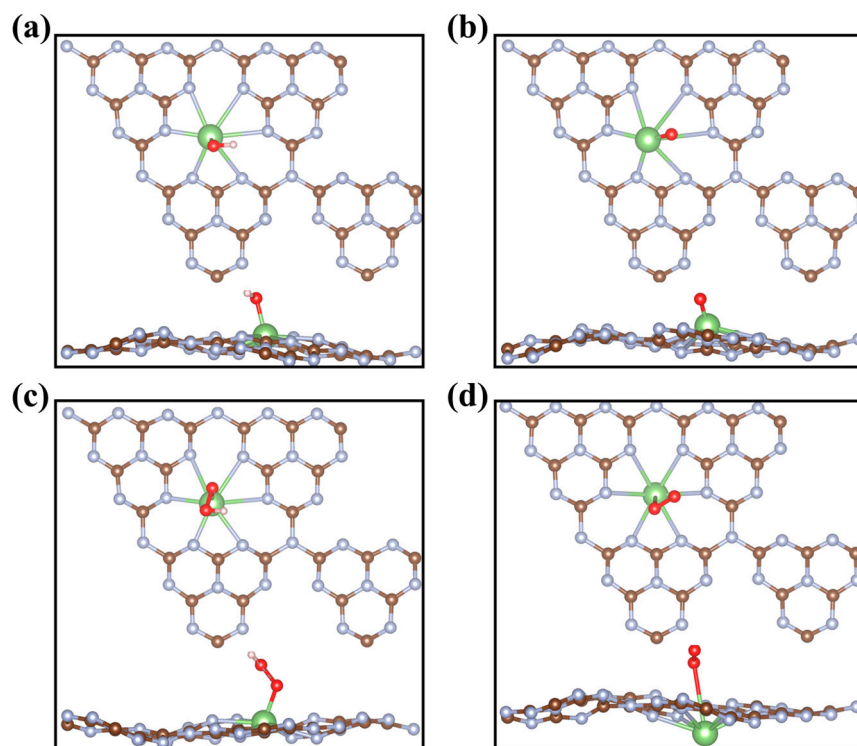

**Figure S3.** Optimized structures for intermediates during OER catalyzed by Ga-C<sub>3</sub>N<sub>4</sub>. (a) \*OH; (b) \*O; (c) \*OOH; (d) \*OO intermediates.

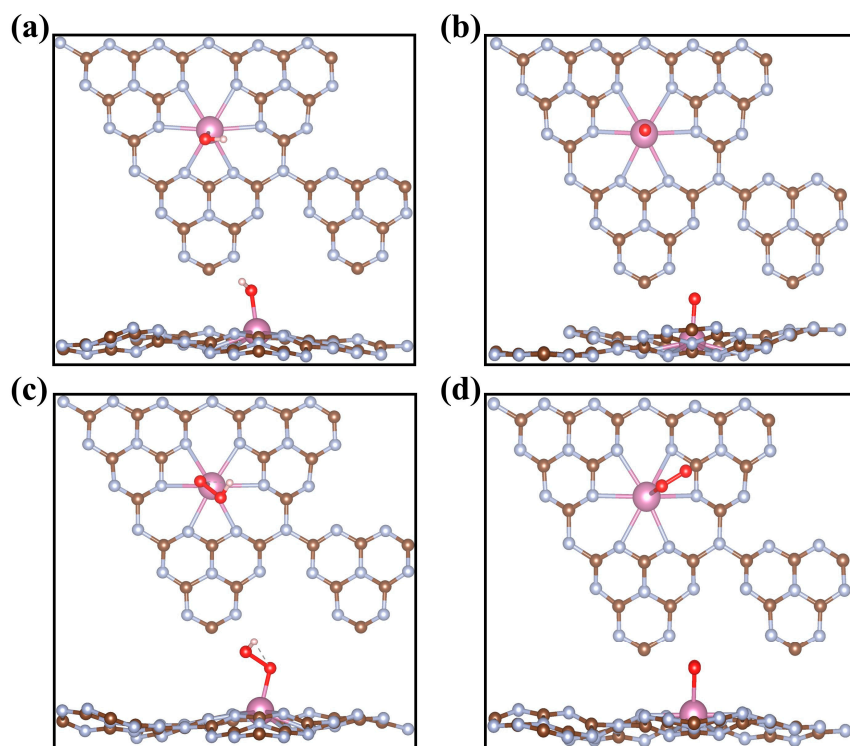

**Figure S4.** Optimized structures for intermediates during OER catalyzed by In-C<sub>3</sub>N<sub>4</sub>. (a) \*OH; (b) \*O; (c) \*OOH; (d) \*OO intermediates.

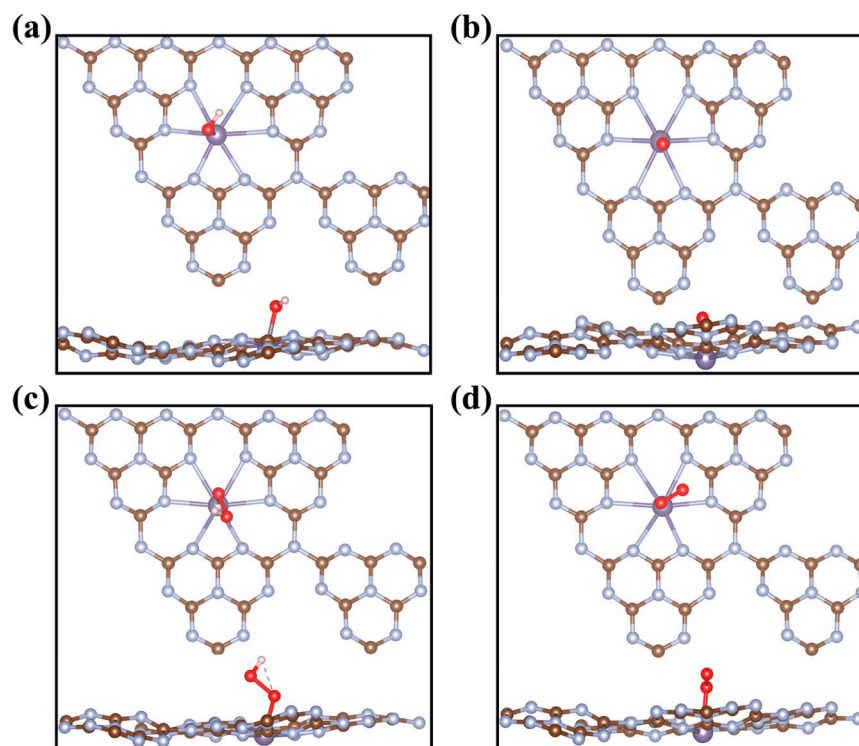

**Figure S5.** Optimized structures for intermediates during OER catalyzed by Ge-C<sub>3</sub>N<sub>4</sub>. (a) \*OH; (b) \*O; (c) \*OOH; (d) \*OO intermediates.

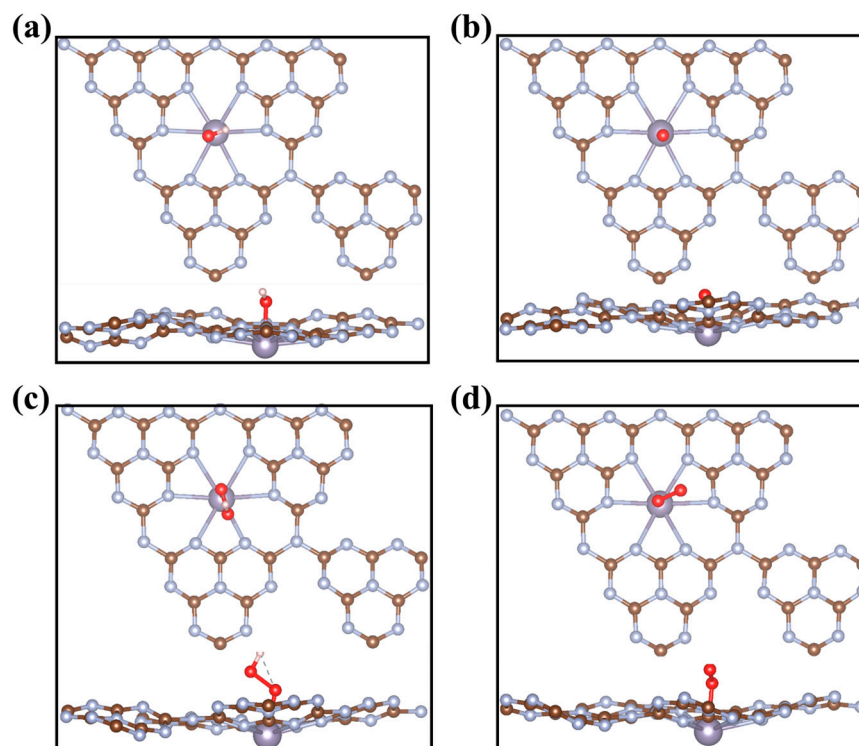

**Figure S6.** Optimized structures for intermediates during OER catalyzed by Sn-C<sub>3</sub>N<sub>4</sub>. (a) \*OH; (b) \*O; (c) \*OOH; (d) \*OO intermediates.

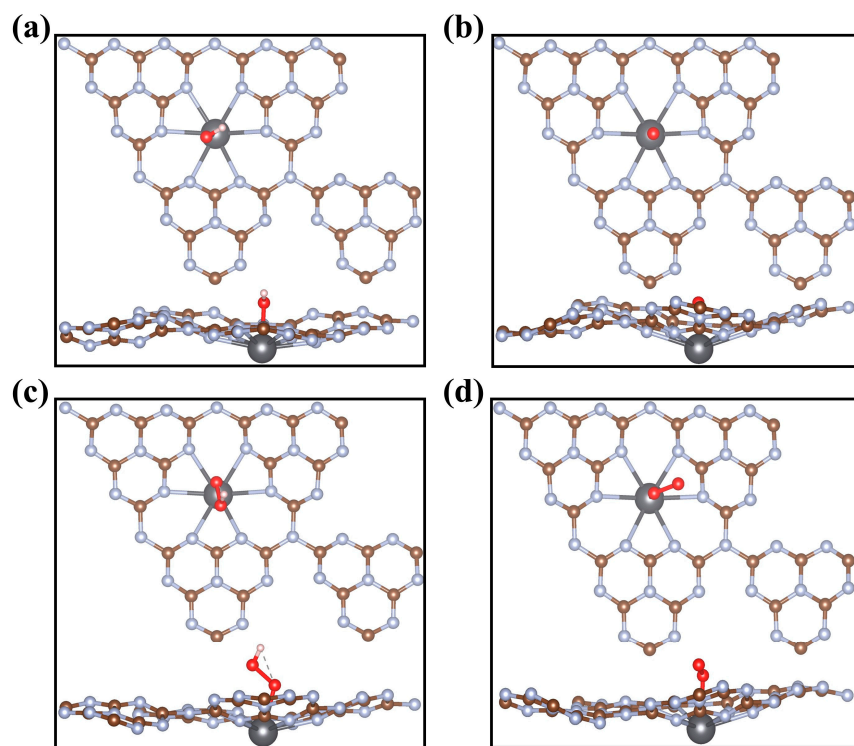

**Figure S7.** Optimized structures for intermediates during OER catalyzed by Pb-C<sub>3</sub>N<sub>4</sub>. (a) \*OH; (b) \*O; (c) \*OOH; (d) \*OO intermediates.

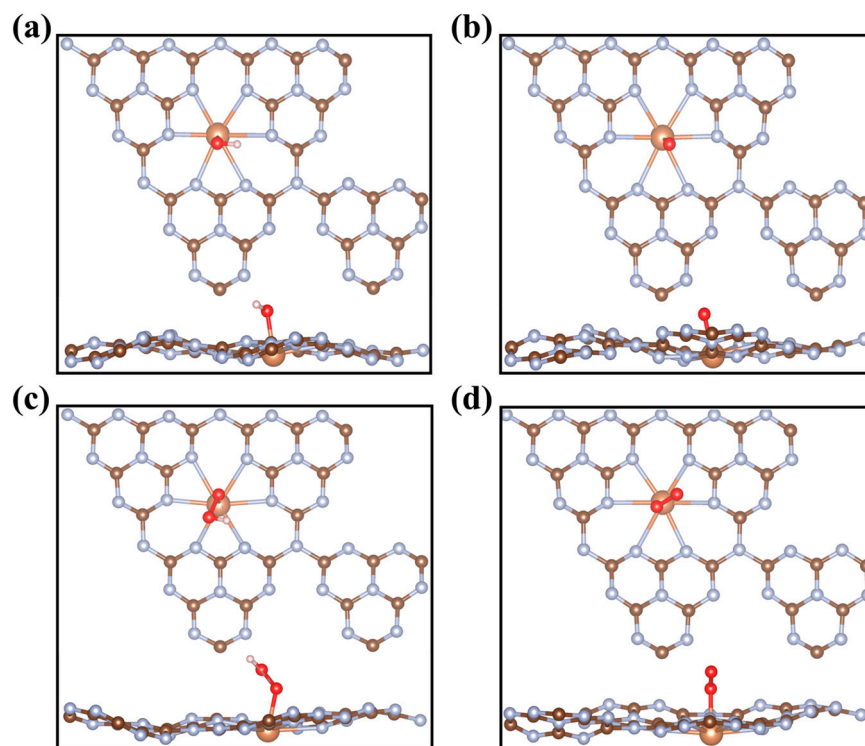

**Figure S8.** Optimized structures for intermediates during OER catalyzed by Sb-C<sub>3</sub>N<sub>4</sub>. (a) \*OH; (b) \*O; (c) \*OOH; (d) \*OO intermediates.

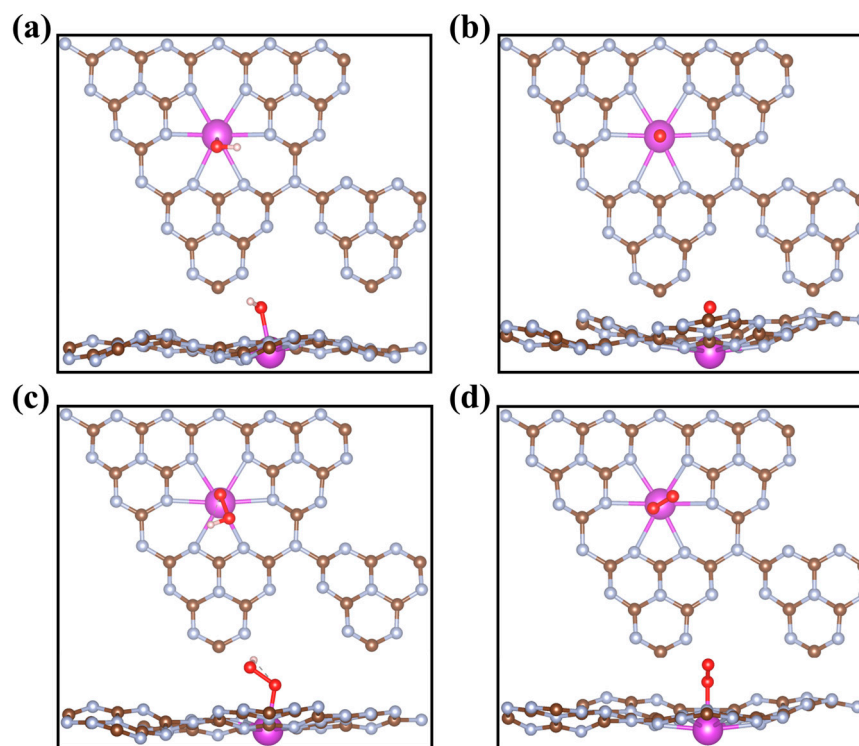

**Figure S9.** Optimized structures for intermediates during OER catalyzed by Bi-C<sub>3</sub>N<sub>4</sub>. (a) \*OH; (b) \*O; (c) \*OOH; (d) \*OO intermediates.

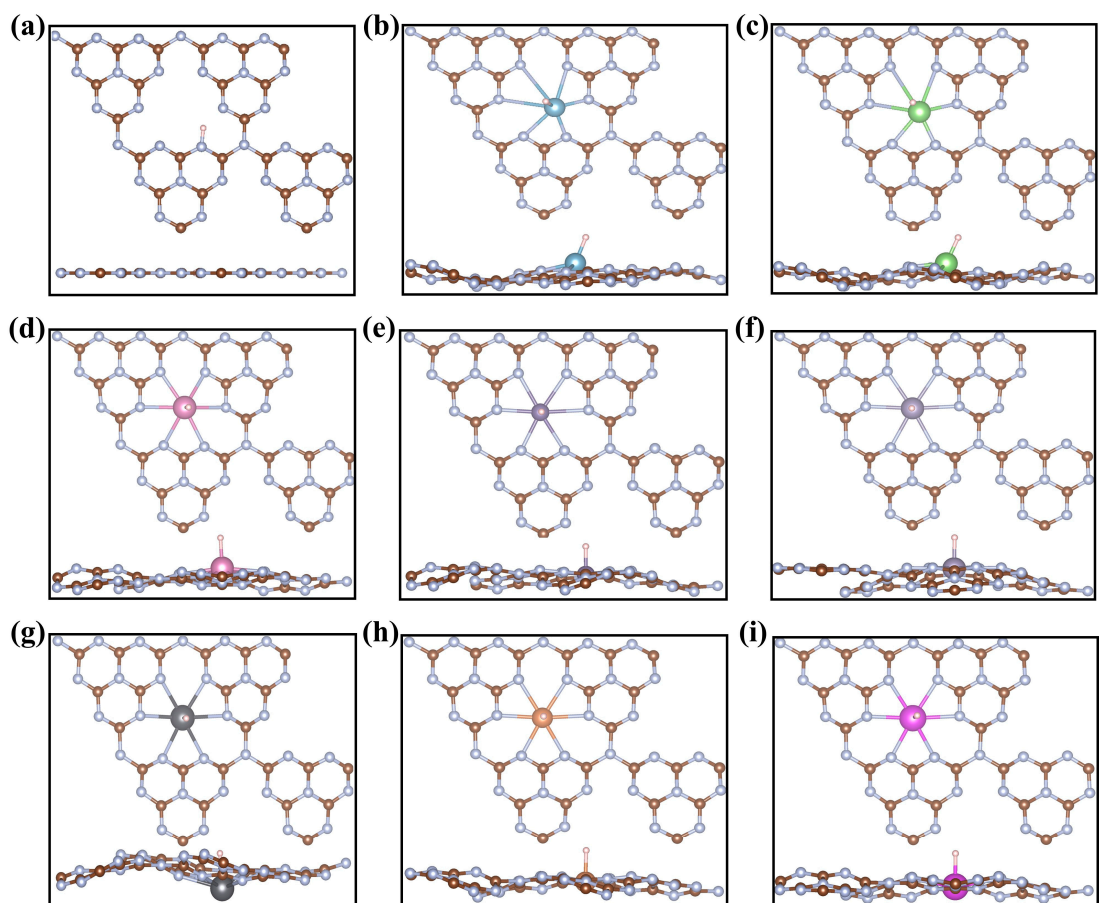

**Figure S10.** Optimized structures for  $^*\text{H}$  on  $g\text{-C}_3\text{N}_4$  and  $\text{PM-C}_3\text{N}_4$ . (a)  $g\text{-C}_3\text{N}_4$ ; (b)  $\text{Al-C}_3\text{N}_4$ ; (c)  $\text{Ga-C}_3\text{N}_4$ ; (d)  $\text{In-C}_3\text{N}_4$ ; (e)  $\text{Ge-C}_3\text{N}_4$ ; (f)  $\text{Sn-C}_3\text{N}_4$ ; (g)  $\text{Pb-C}_3\text{N}_4$ ; (h)  $\text{Sb-C}_3\text{N}_4$  and (i)  $\text{Bi-C}_3\text{N}_4$ .



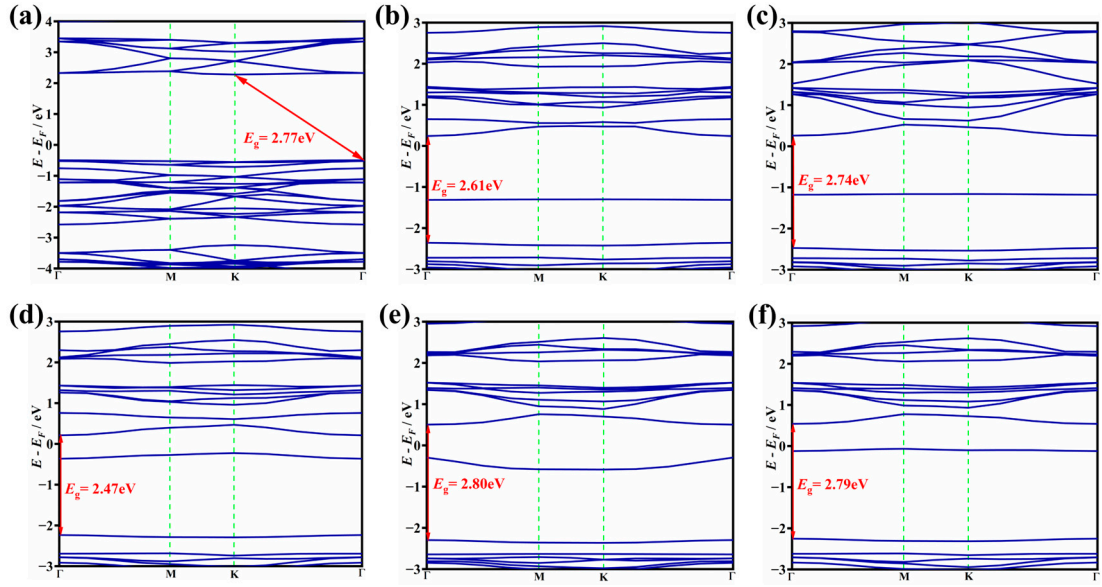

**Figure S11.** The electronic band structures of  $g\text{-C}_3\text{N}_4$  and  $\text{PM-C}_3\text{N}_4$ . (a)  $g\text{-C}_3\text{N}_4$ ; (b)  $\text{Al-C}_3\text{N}_4$ ; (c)  $\text{Ga-C}_3\text{N}_4$ ; (d)  $\text{In-C}_3\text{N}_4$ ; (e)  $\text{Sb-C}_3\text{N}_4$  and (f)  $\text{Bi-C}_3\text{N}_4$ .

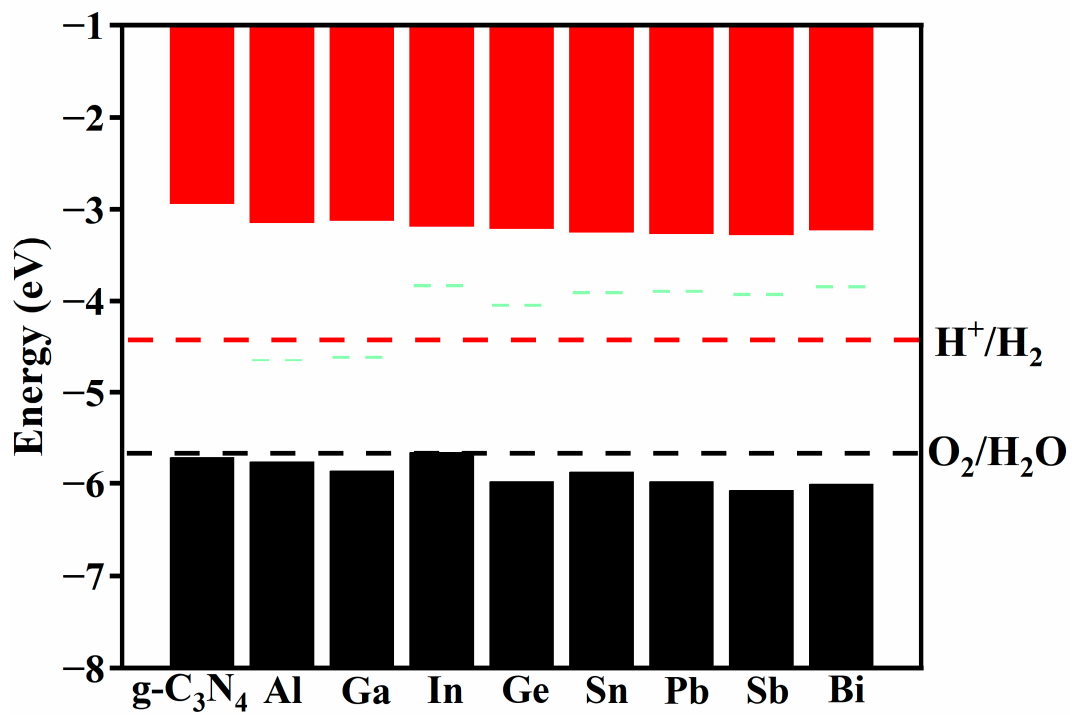

**Figure S12.** Band edges (i.e., VBM and CBM) alignment of *g*-C<sub>3</sub>N<sub>4</sub> and PM-C<sub>3</sub>N<sub>4</sub> corresponding to the redox potential for water splitting. The green dash-lines represent the doping energy level.

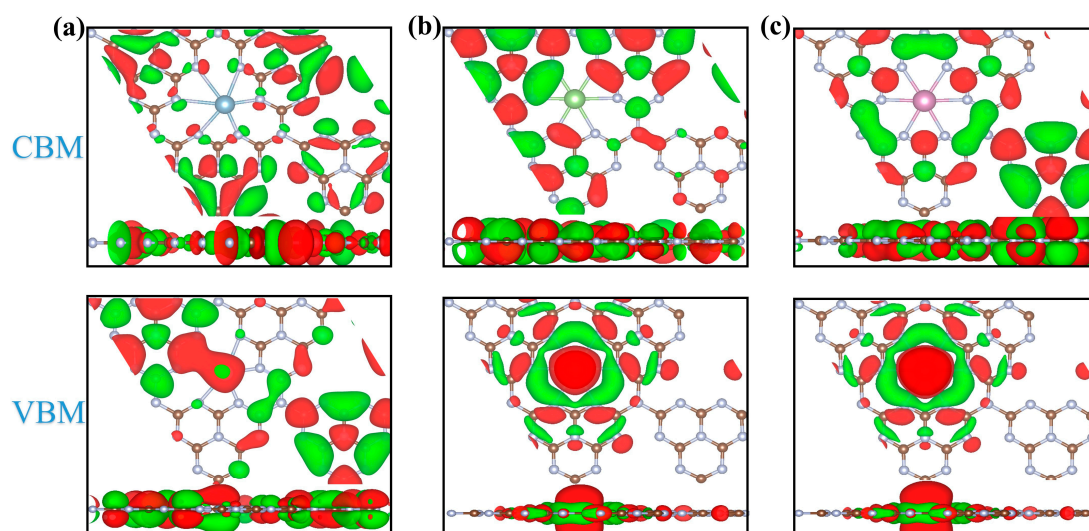

**Figure S13.** The isosurface (isolevel:  $0.008 \text{ e}/\text{\AA}^3$ ) of band-decomposed electron density for the CBM (upper) and VBM (bottom) of PM- $\text{C}_3\text{N}_4$  (PM=Al, Ga, In). (a) Al- $\text{C}_3\text{N}_4$ ; (b) Ga- $\text{C}_3\text{N}_4$  and (c) In- $\text{C}_3\text{N}_4$ .

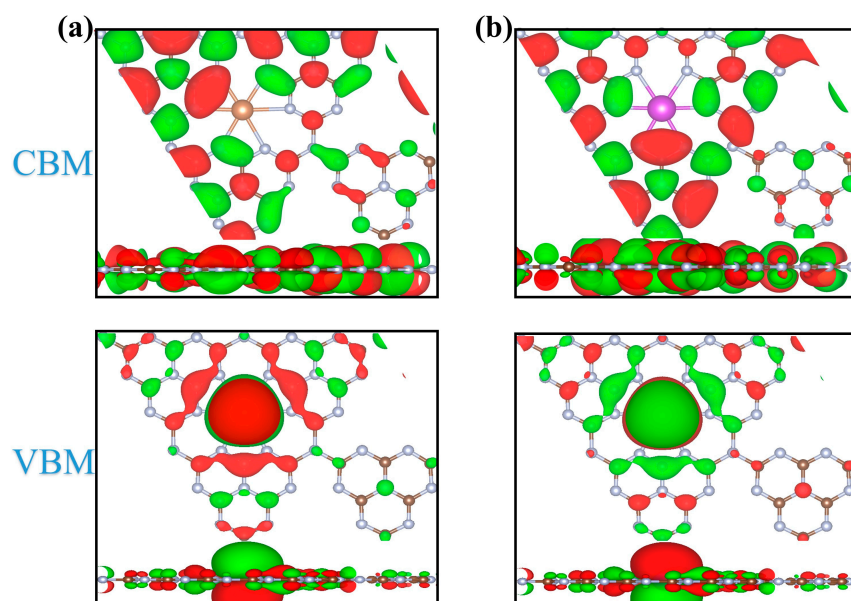

**Figure S14.** The isosurface (isolevel:  $0.008 \text{ e}/\text{\AA}^3$ ) of band-decomposed electron density for the CBM (upper) and VBM (bottom) of PM- $\text{C}_3\text{N}_4$  (PM=Sn, Bi). (a) Sn- $\text{C}_3\text{N}_4$  and (b) Bi- $\text{C}_3\text{N}_4$ .
